# Supplementary material for: The reversion variant (p.Arg90Leu) at the evolutionarily adaptive p.Arg90 site in CELA3B predisposes to chronic pancreatitis
Source: bioRxiv or medRxiv preprint supplement (doi:10.1101/2020.11.28.20240135), 2020-11-30
Supplement: Supplementary file [file media-1.pdf]

**Supplementary Table S1.** Primers used for amplifying the different parts of the *CELA3B* gene

| Exon   | Primer sequence (5' to 3')                                          | Amplicon size (bp) |
|--------|---------------------------------------------------------------------|--------------------|
| 1 to 4 | Forward: GCTAGGATTACCGGTGCTG<br>Reverse: TGAGAACCACTGCCCTCTGT       | 5,935              |
| 5 to 7 | Forward: GTCAGAGTGACCCAAGGGACTAG<br>Reverse : TTAGATGGGATGTGTGCATAG | 6,012              |
| 8      | Forward: CTATGCACACATCCCATCTAAAT<br>Reverse: TGGACATCCTGCCATTAGAA   | 4,026              |
