# Supplementary material for: The reversion variant (p.Arg90Leu) at the evolutionarily adaptive p.Arg90 site in CELA3B predisposes to chronic pancreatitis
Source: bioRxiv or medRxiv preprint supplement (doi:10.1101/2020.11.28.20240135), 2020-11-30
Supplement: Supplementary file [file media-2.pdf]

**Supplementary Table S2.** Primer used for sequencing the eight exons of the *CELA3B* gene

| Exon    | Primer sequence (5' to 3')   |
|---------|------------------------------|
| 1       | Forward: AGGAGGTCTTGTCTGAC   |
| 2       | Forward: GCATGGGGTCACACAGC   |
| 3 and 4 | Reverse: CAGACTTGGCTGTGGGTC  |
| 5       | Forward: GAGTGGATTTGGAGGGT   |
| 6       | Reverse: CAGGCAAGATCCTTCCTC  |
| 7       | Forward: AGCTAAGGCTCAGAGGA   |
| 8       | Forward : CTGAGGCTCAGAGAGGTC |
